# Supplementary material
Source: publisher figshare collection journal article supplement (https://gsajournals.figshare.com/ndownloader/files/28924590)

**Fig S1.**

[illegible]

**Fig S2**

Populations of multiple generations of *35S:TERT* line 7 plants, from G10/T6 through G16/T12. No obvious growth or developmental difference is observed with progressive generations at the population level.

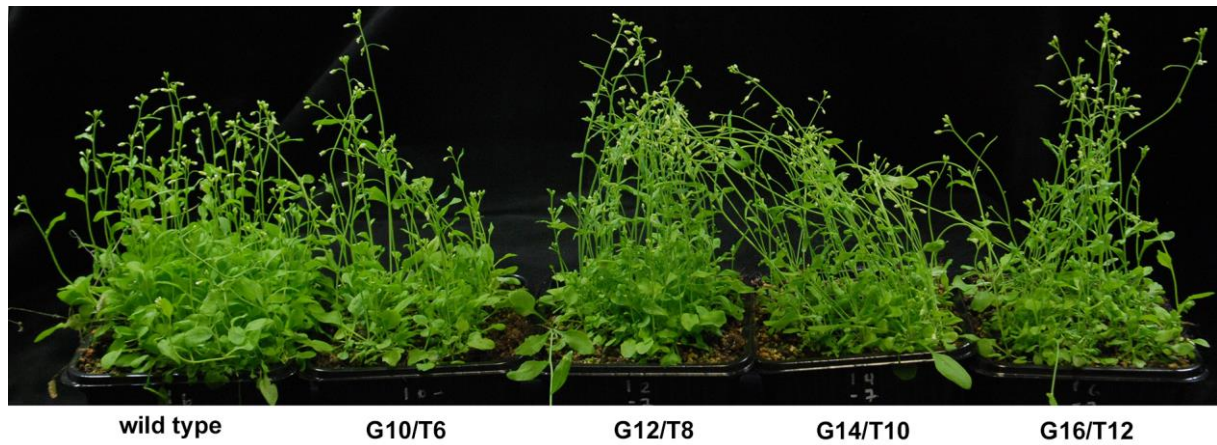

**Fig S3**

Schematic displaying the generation of *tert ku70 35S:TERT* lines.

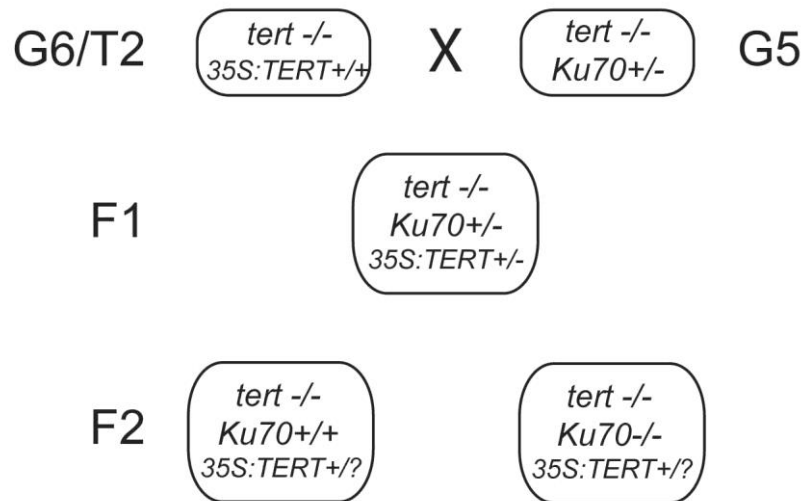

**Fig S4**

Schematic displaying the generation of the *tert pot1a* 35S:*TERT* lines.

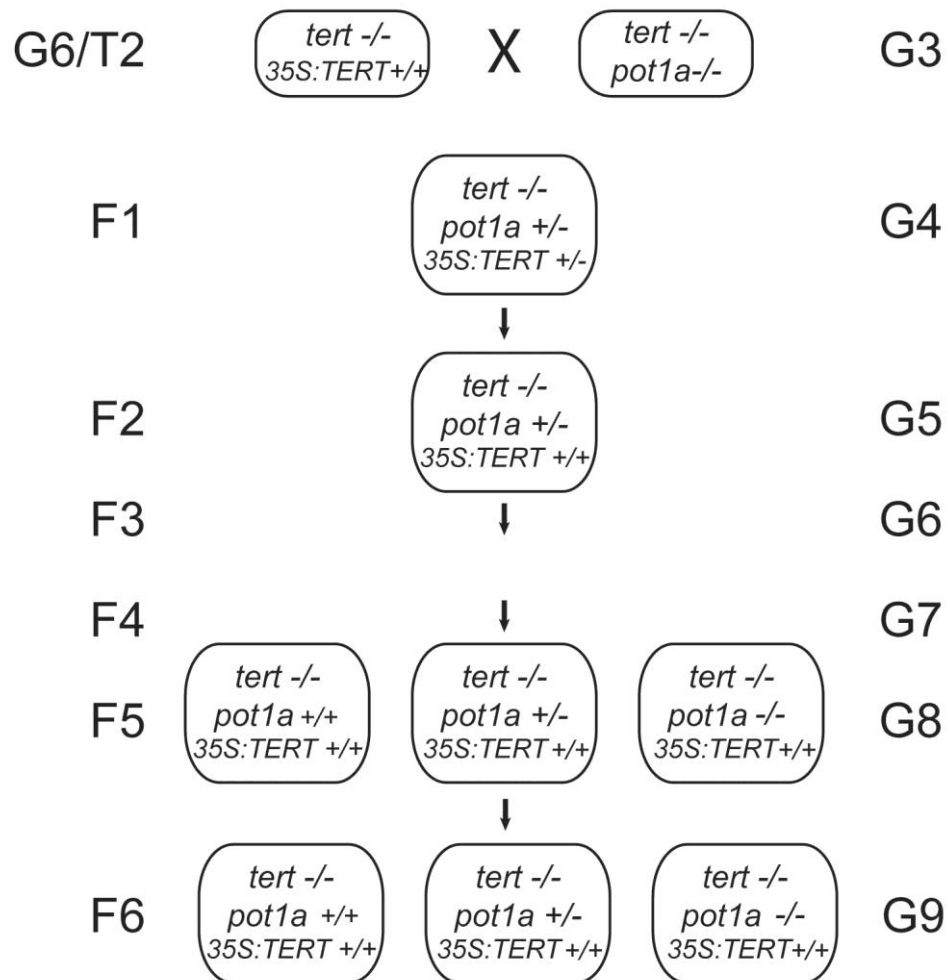

Supplement: Supplementary file 1 [file 28924590]
